# Supplementary material for: Core Microbiota in Agricultural Soils and Their Potential Associations with Nutrient Cycling
Source: PubMed Central journal article supplement (PMC6435817; doi:10.1128/msystems.00313-18), 2019-03-26

Figure S1

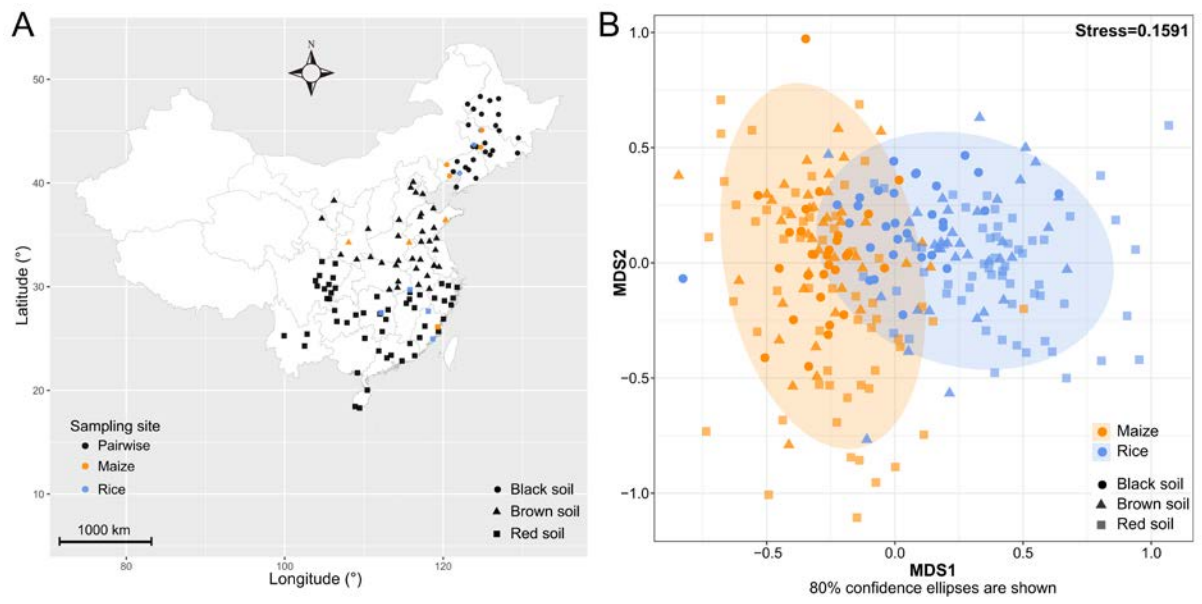

Supplement: mSystems.00313-18-sf001.pdf [file mSystems.00313-18-sf001.pdf]
