# Supplementary material for: Core Microbiota in Agricultural Soils and Their Potential Associations with Nutrient Cycling
Source: PubMed Central journal article supplement (PMC6435817; doi:10.1128/msystems.00313-18), 2019-03-26
Supplement: mSystems.00313-18-st003.pdf [file mSystems.00313-18-st003.pdf]

**Table S3A** The Permutational MANOVA (ADONIS) analysis showed that MAT significantly affected the bacterial community in each soil type.

| <i>Soil type</i> | <i>R</i> <sup>2</sup> |             |
|------------------|-----------------------|-------------|
|                  | <i>Maize</i>          | <i>Rice</i> |
| Black soils      | 0.0558*               | 0.0399*     |
| Brown soils      | 0.0752***             | 0.0844***   |
| Red soils        | 0.0578**              | 0.0441***   |

\*  $p < 0.05$ ; \*\*  $p < 0.01$ ; \*\*\*  $p < 0.001$

**Table S3B** Variation explained by bacterial  $\alpha$ - and  $\beta$ -diversity indices in the regression models of soil multinutrient cycling index for maize and rice fields.

| <i>Diversity index</i> | Soil multi-nutrients cycling index |             |
|------------------------|------------------------------------|-------------|
|                        | <i>Maize</i>                       | <i>Rice</i> |
| Alpha-Shannon          | 7.40%                              |             |
| Alpha-Richness         | 9.37%                              |             |
| Beta-NMDS1             | 4.93%                              | 8.54%       |
| Beta-NMDS2             |                                    | 1.78%       |
| Total                  | 21.70%                             | 10.32%      |

NA, not statistically significant ( $p > 0.05$ )
